# Supplementary material
Source: PubMed Central journal article supplement (PMC8670146)
Supplement: mmc1.pdf [file mmc1.pdf]

## Supporting Information

# Efficient discovery of potential inhibitors for SARS-CoV-2 3C-like protease from herbal extracts using a native MS- based affinity-selection method

Dafu Zhu<sup>a, b, c</sup>, Haixia Su<sup>c, d</sup>, Changqiang Ke<sup>b</sup>, Chunping Tang<sup>b</sup>, Matthias Witt<sup>e</sup>, Ronald J Quinn<sup>f</sup>, Yechun Xu<sup>c, d\*</sup>, Jia Liu<sup>g, h\*</sup>, Yang Ye<sup>a, b, c\*</sup>

<sup>a</sup> School of Life Science and Technology, ShanghaiTech University, Shanghai 201203, China

<sup>b</sup> State Key Laboratory of Drug Research, and Natural Products Chemistry Department, Shanghai Institute of Materia Medica, Chinese Academy of Sciences, Shanghai, 201203, China

<sup>c</sup> University of Chinese Academy of Sciences, Beijing, 100049, China

<sup>d</sup> CAS Key Laboratory of Receptor Research, Shanghai Institute of Materia Medica, Chinese Academy of Sciences, Shanghai 201203, China

<sup>e</sup> Bruker Daltonik GmbH, Bremen 28359, Germany

<sup>f</sup> Griffith Institute for Drug Discovery, Griffith University, Brisbane, QLD, 4111, Australia

<sup>g</sup> Shanghai Institute of Materia Medica, Chinese Academy of Sciences, Shanghai, 201203, China

<sup>h</sup> School of Pharmaceutical Science and Technology, Hangzhou Institute for Advanced Study, University of Chinese Academy of Sciences, Hangzhou 310058, China.

\*Corresponding authors: ycxu@simm.ac.cn (Yechun Xu); jia.liu@simm.ac.cn (Jia Liu); yye@simm.ac.cn (Yang Ye)

## Contents

Figure S1. The ELSD and UV response of the crude extracts of *Scutellaria baicalensis*

Figure S2. The ELSD and UV response of the crude extracts of *Andrographis paniculata*

Figure S3. The ELSD and UV response of the crude extracts of *Glycyrrhiza uralensis*

Figure S4. The ELSD and UV response of the crude extracts of *Forsythia suspensa*

Figure S5. The ELSD and UV response of the crude extracts of *Lonicera japonica*

Figure S6. The ELSD and UV response of the crude extracts of *Cirsium japonicum*

Figure S7. Representative MS spectra of the affinity screening of *Scutellaria baicalensis*

Figure S8. Representative MS spectra of the affinity screening of *Glycyrrhiza uralensis*

Figure S9. Representative MS spectra of the affinity screening of *Forsythia suspensa*

Figure S10. Representative MS spectra of the affinity screening of *Lonicera japonica*

Figure S11. Representative MS spectra of the affinity screening of *Cirsium japonicum*

Figure S12. The chromatograms and mass spectra of the hit compounds

Figure S13. MS spectra of 3CLpro incubated with the representative compounds at the same concentration.

Table S1. The weights of the 96 fractions after lyophilization

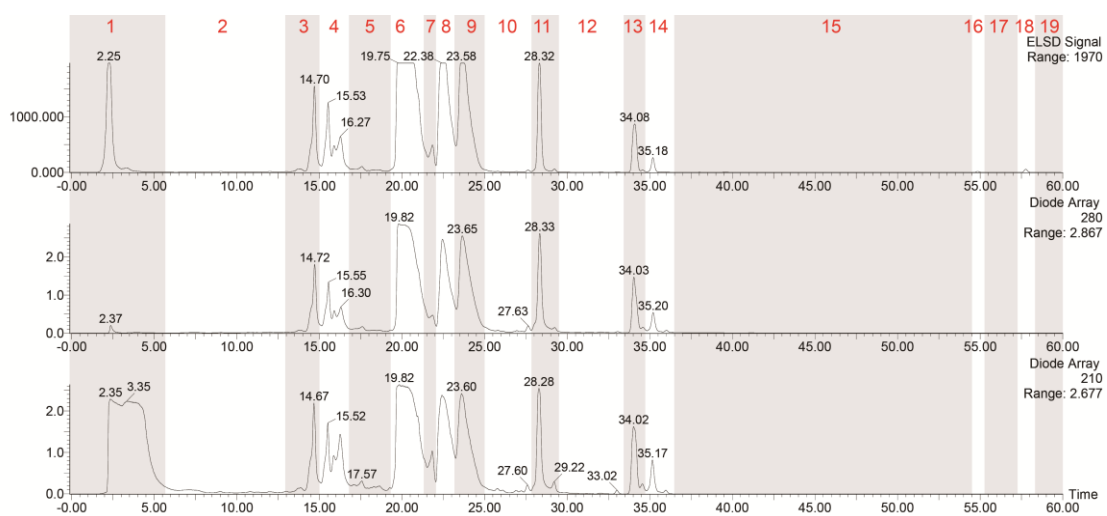

Figure S1. The ELSD and UV response of the crude extracts of *Scutellaria baicalensis*

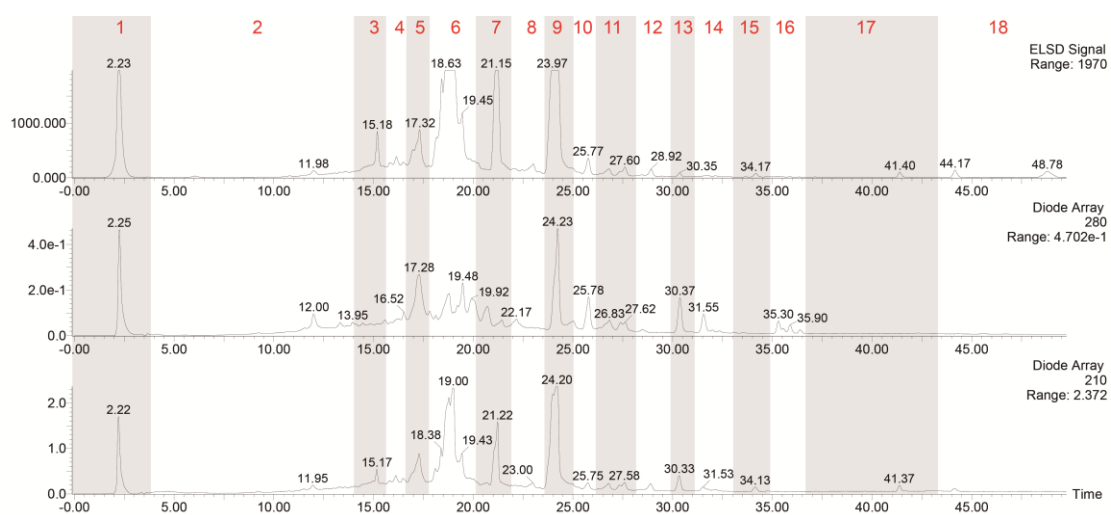

Figure S2. The ELSD and UV response of the crude extracts of *Andrographis paniculata*

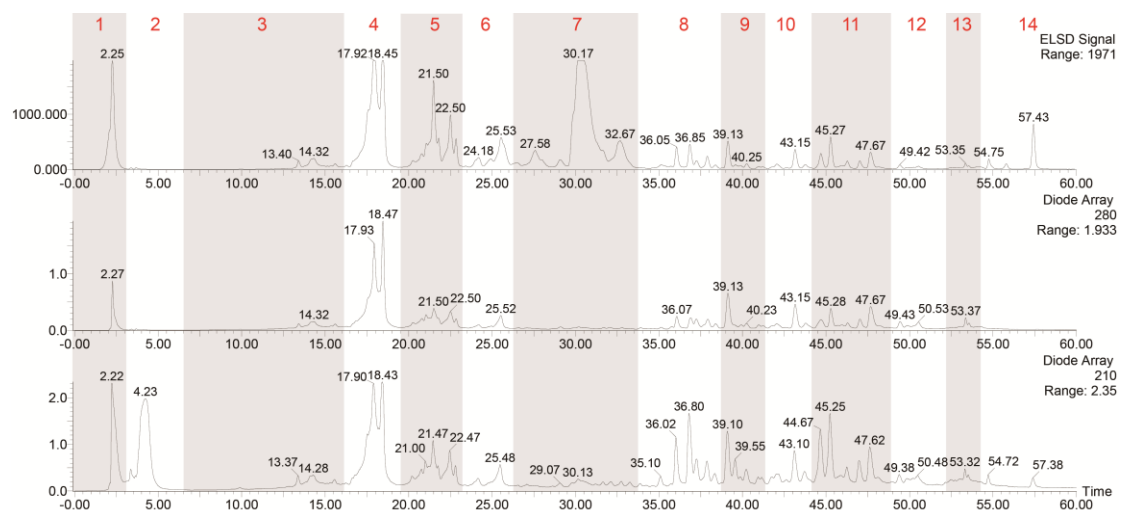

Figure S3. The ELSD and UV response of the crude extracts of *Glycyrrhiza uralensis*

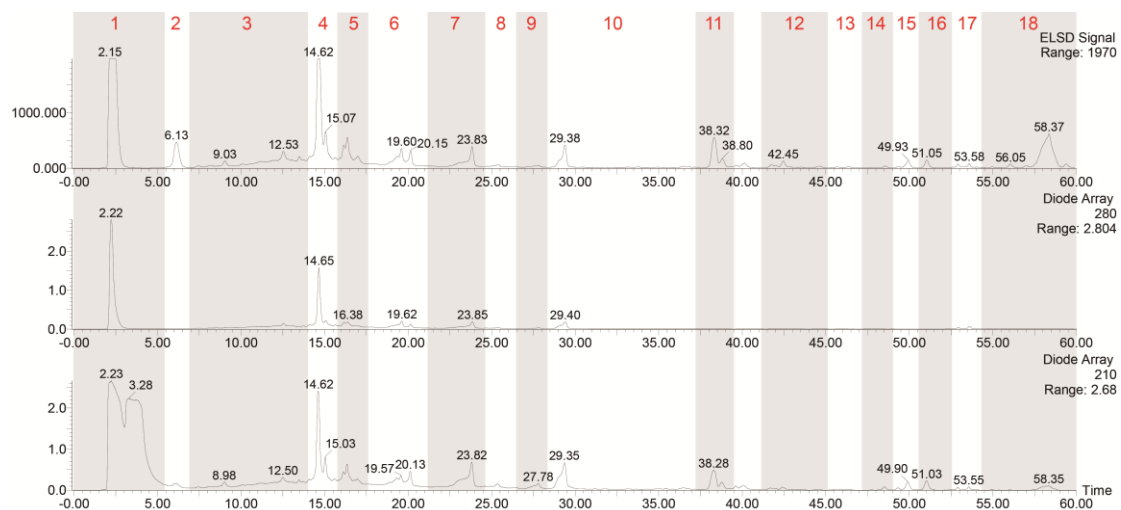

Figure S4. The ELSD and UV response of the crude extracts of *Forsythia suspensa*

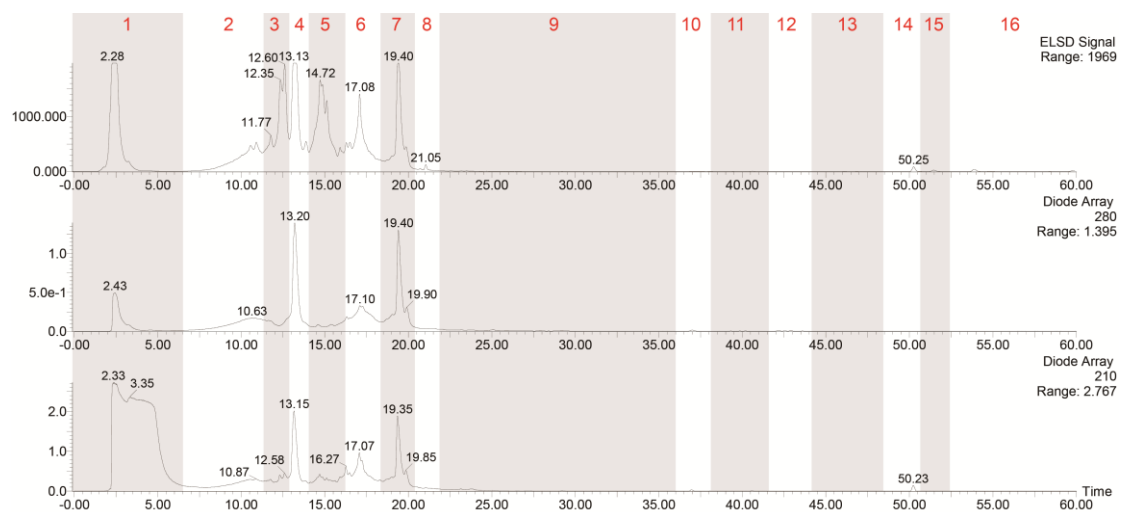

Figure S5. The ELSD and UV response of the crude extracts of *Lonicera japonica*

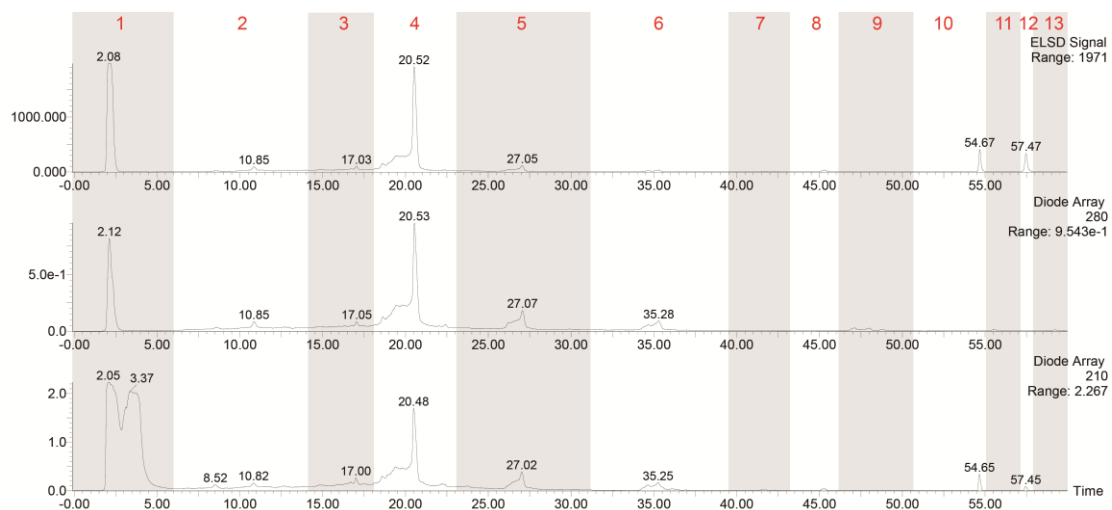

Figure S6. The ELSD and UV response of the crude extracts of *Cirsium japonicum*

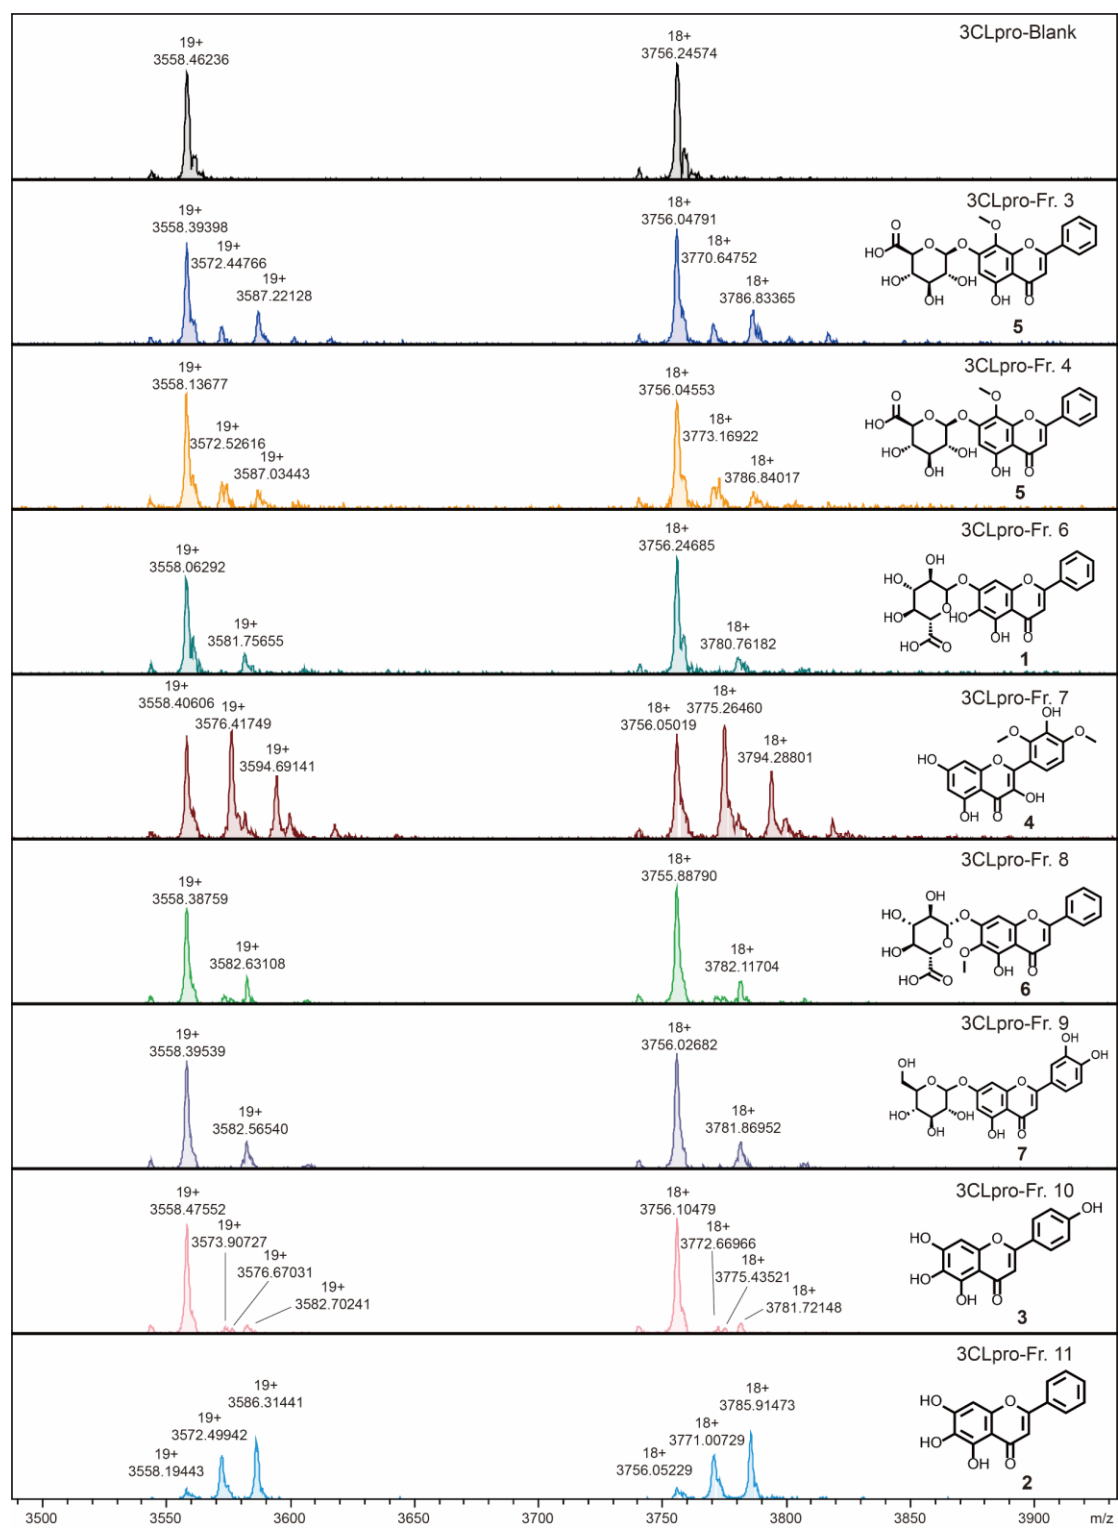

Figure S7. Representative MS spectra of the affinity screening of *Scutellaria baicalensis*

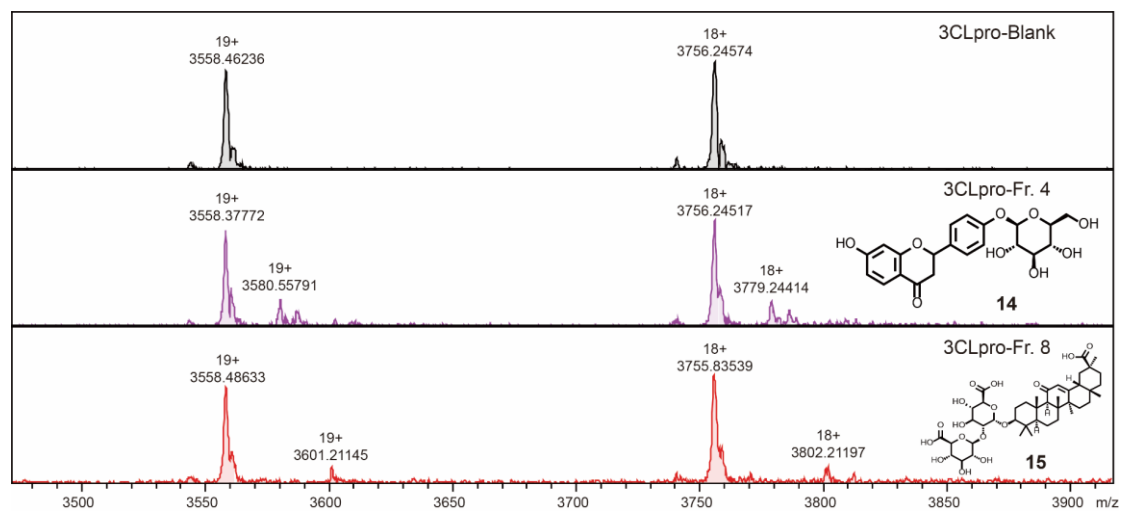

Figure S8. Representative MS spectra of the affinity screening of *Glycyrrhiza uralensis*

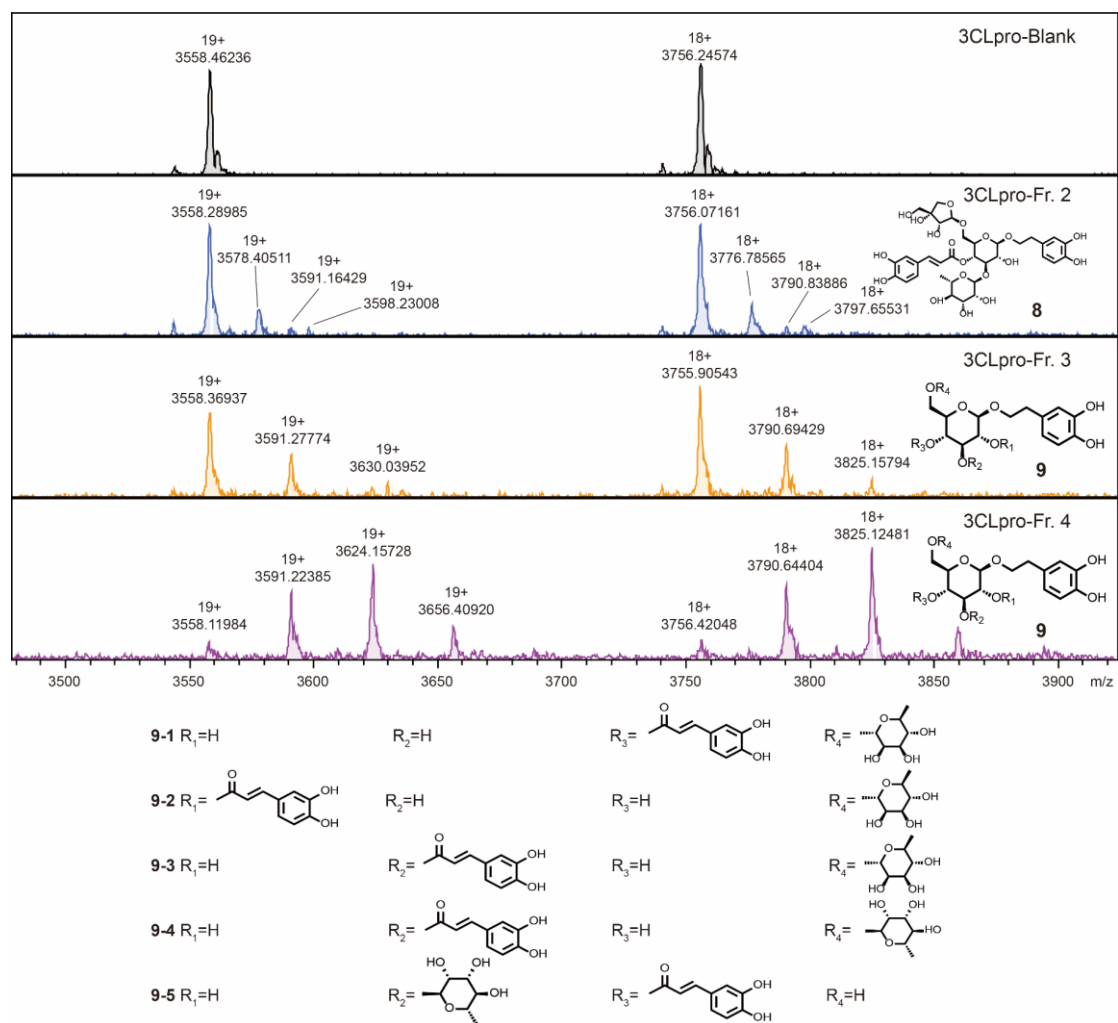

Figure S9. Representative MS spectra of the affinity screening of *Forsythia suspensa*. The compounds in fractions 3 and 4 were isomers or same compound caused by chromatographic peak tail dragging during pre-separation. Their suggested structures are showed at the bottom.



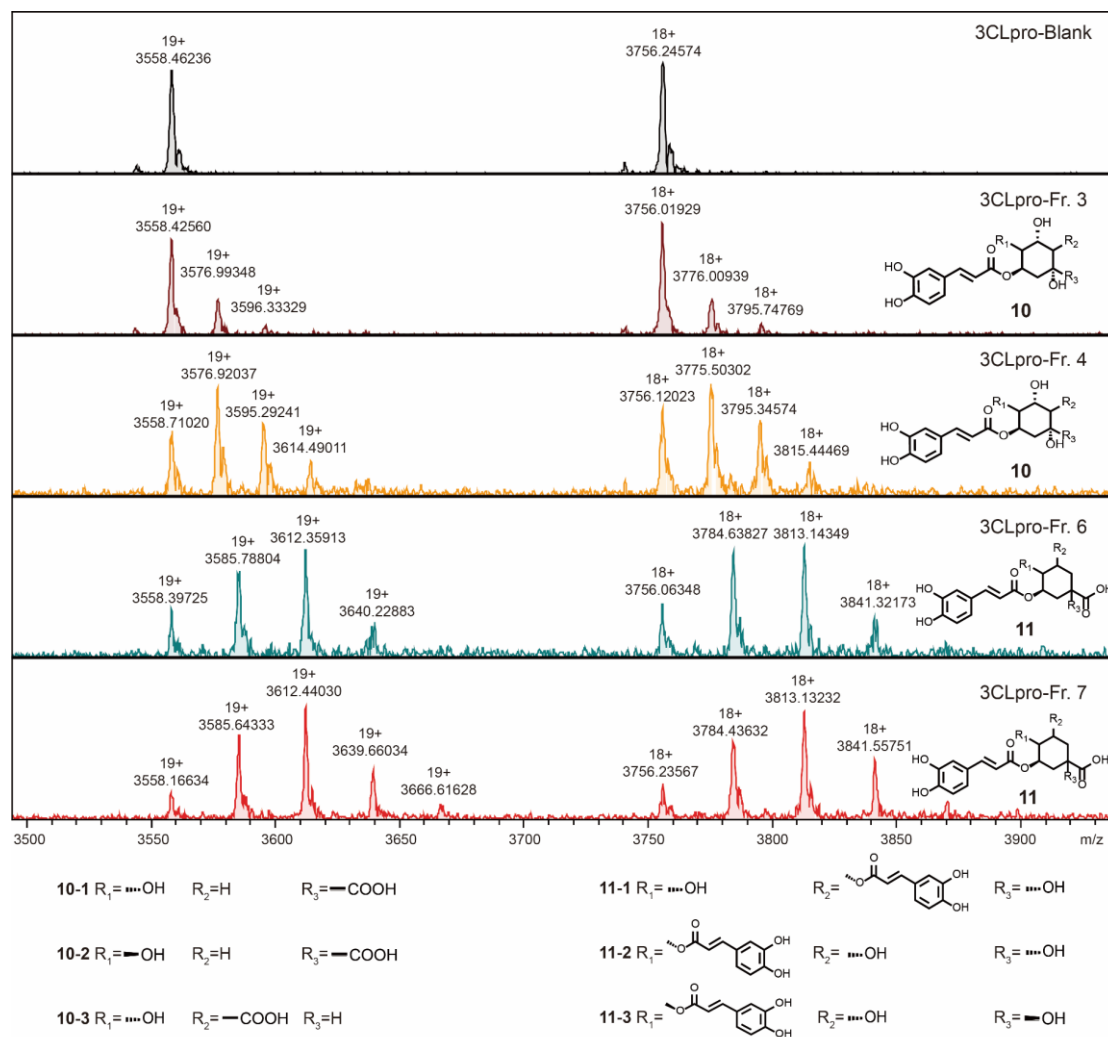

Figure S10. Representative MS spectra of the affinity screening of *Lonicera japonica*. Compound 10 were detected in fractions 3 and 4 and the representative isomers are showed at the bottom. Due to the same reason, the probable isomers of compound 11 which from fractions 6 and 7 are showed at the bottom too.

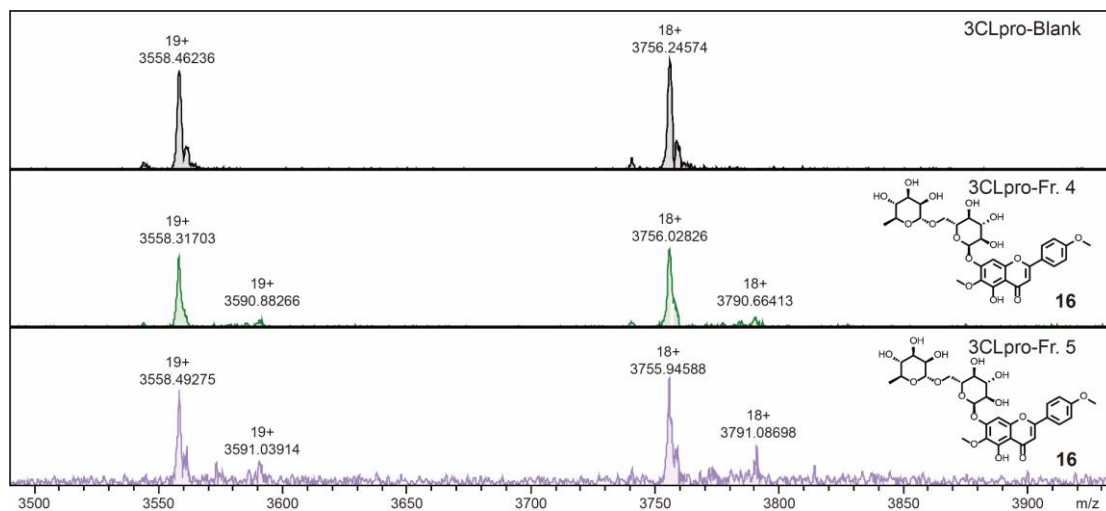

Figure S11. Representative MS spectra of the affinity screening of *Cirsium japonicum*

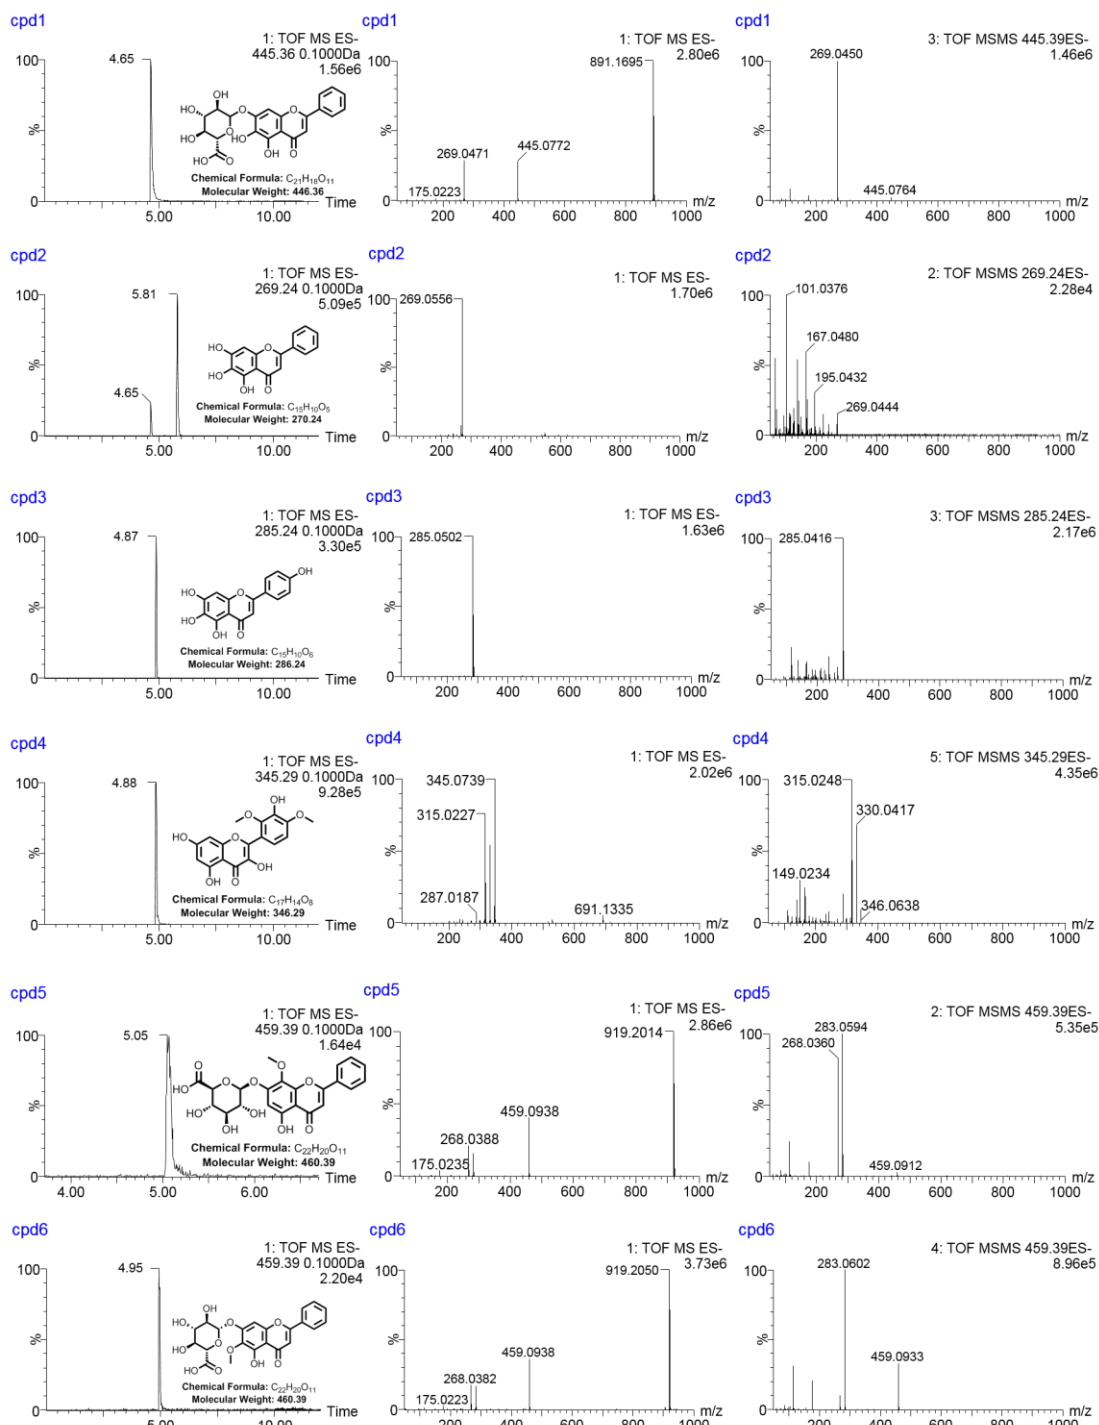

Figure S12. The chromatograms and mass spectra of the hit compounds

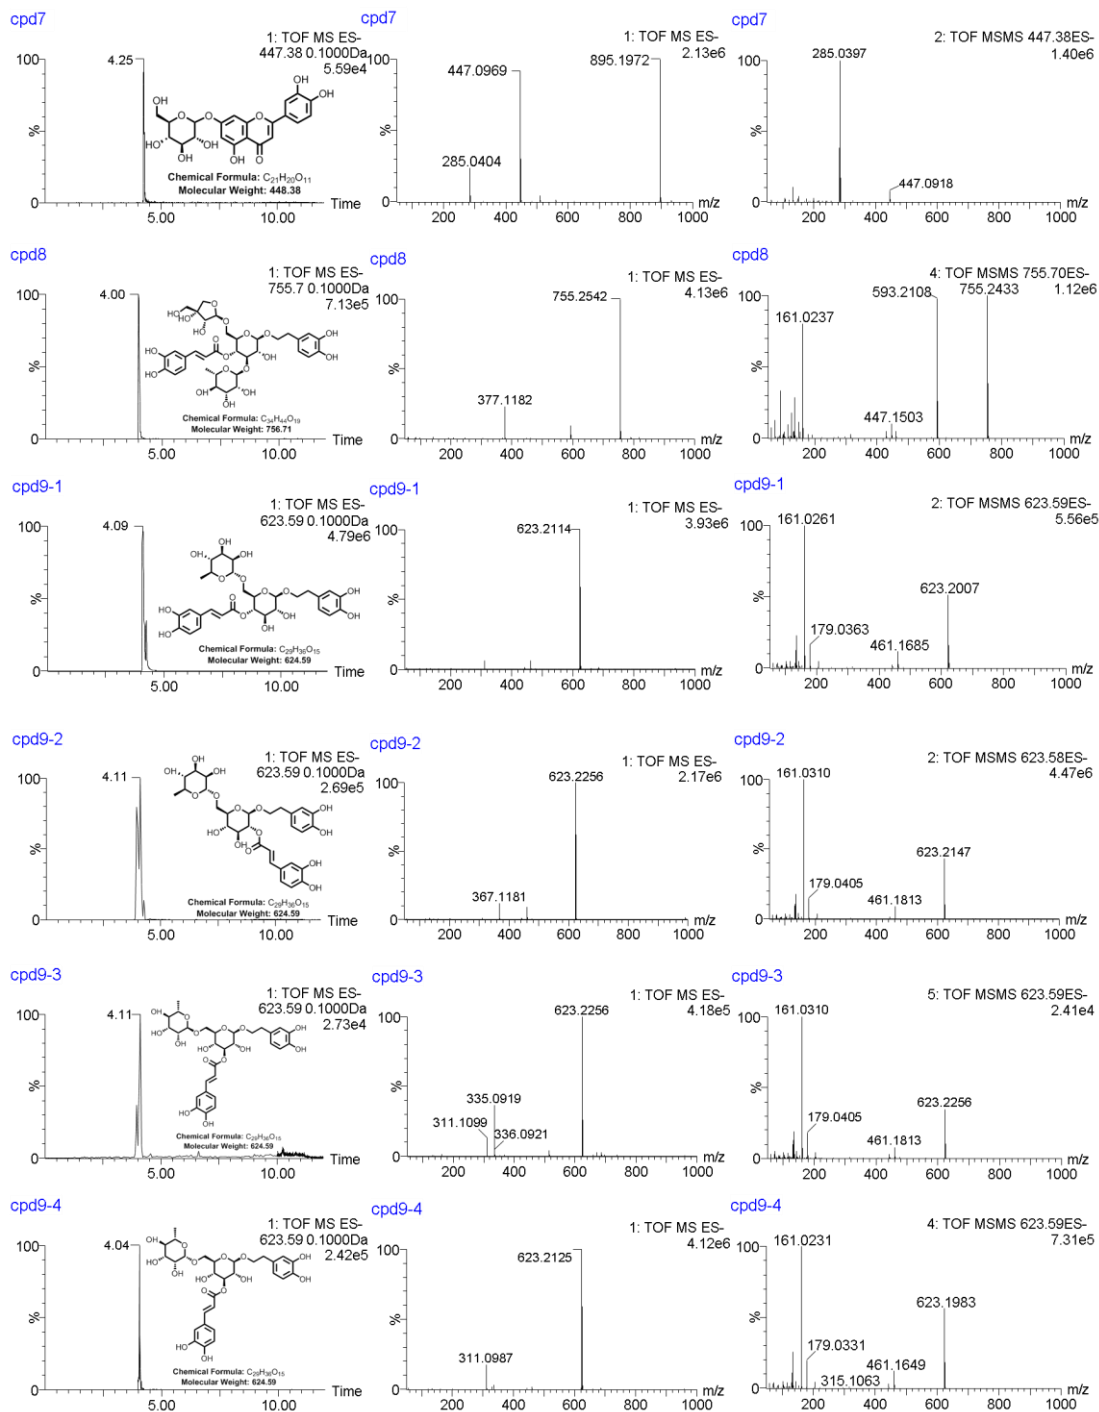

Figure S12. (continued)

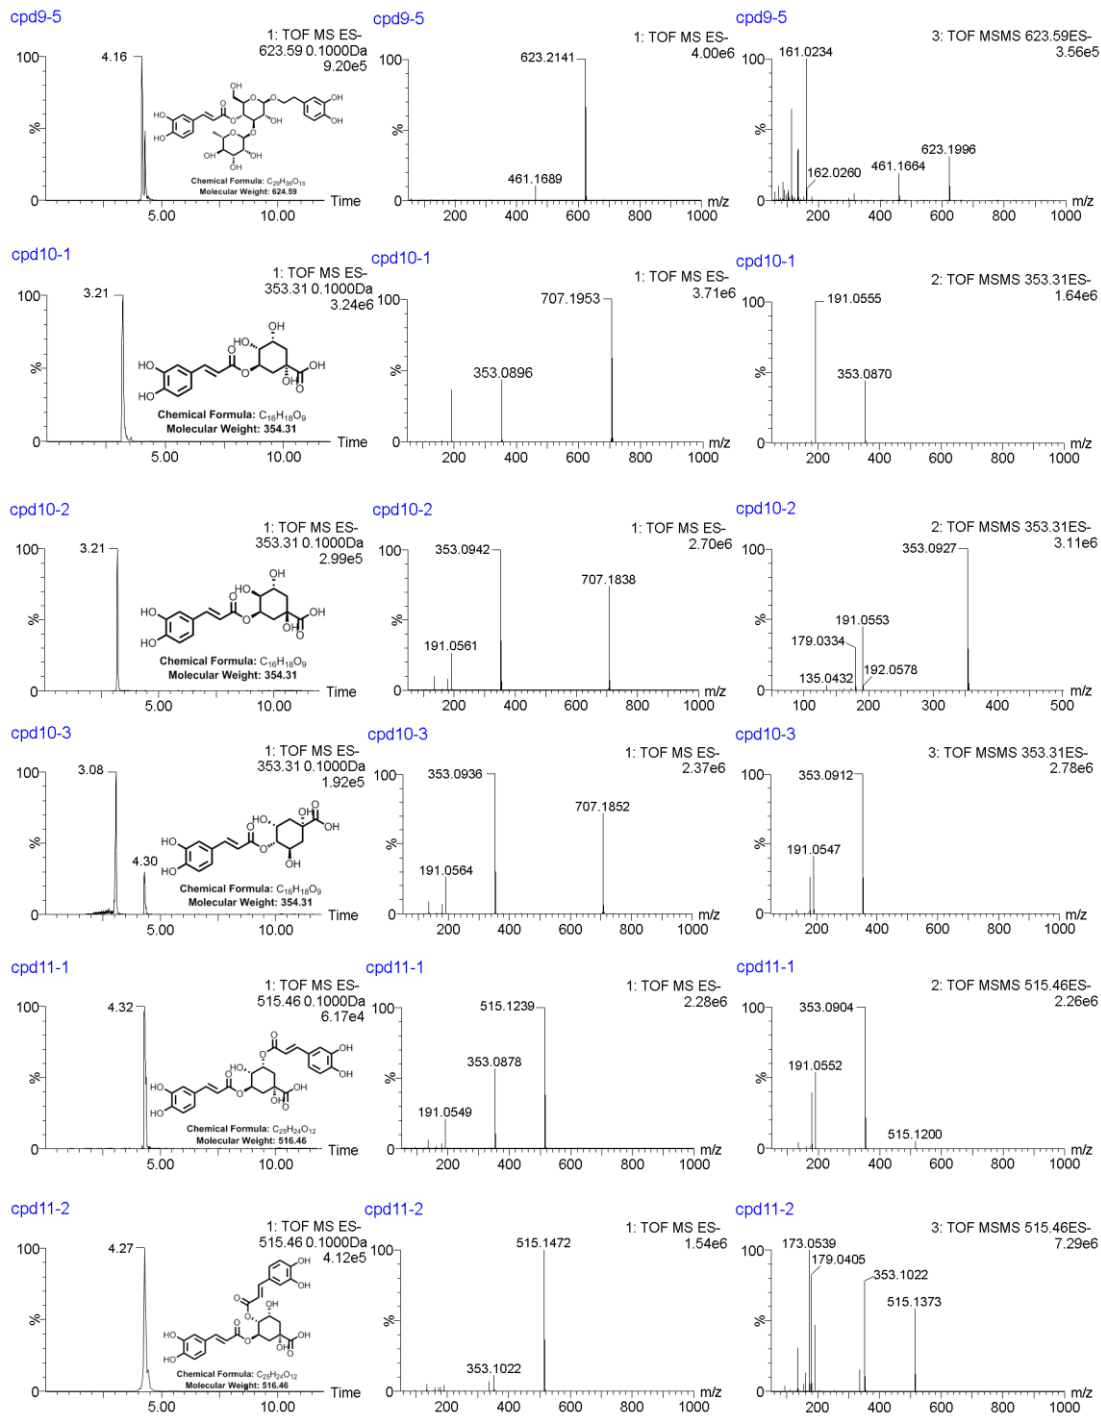

Figure S12. (continued)

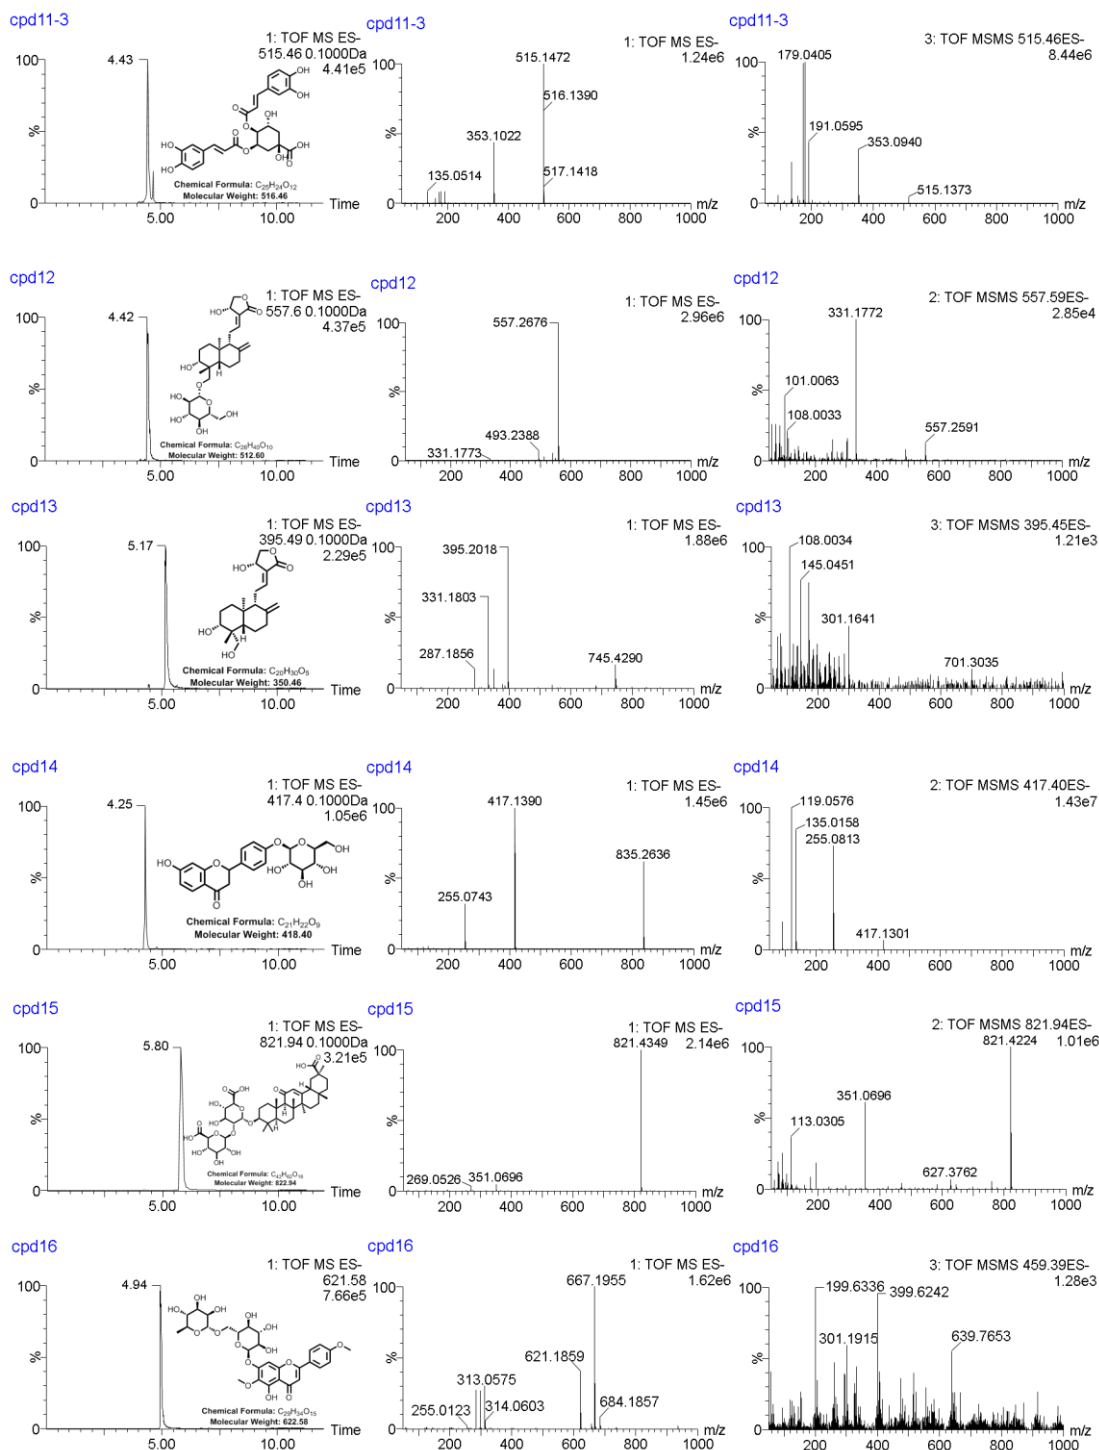

Figure S12. (continued)

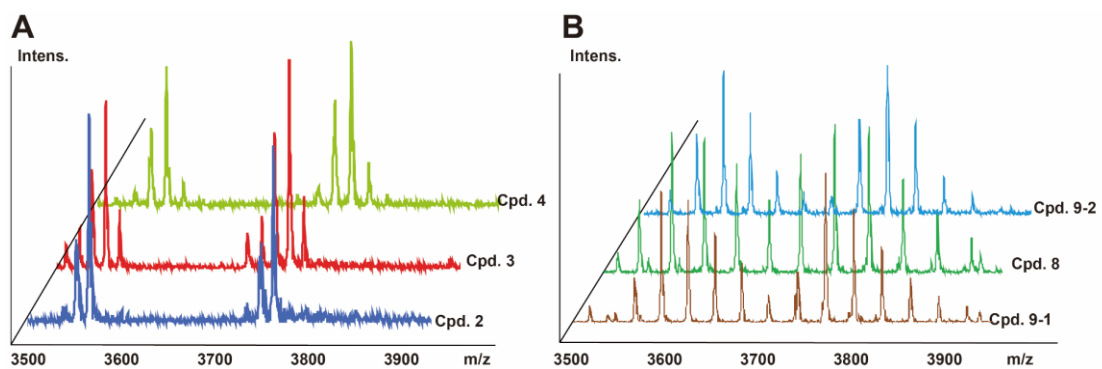

Figure S13. MS spectra of 3CLpro incubated with the representative compounds at the same concentration. (A) Representative MS spectra of 3CLpro incubated with compound 2, 3 and 4 at the concentration of 12.5  $\mu\text{M}$ . (B) Representative MS spectra of 3CLpro incubated with compound 8 or 9 at the concentration of 12.5  $\mu\text{M}$ .

Table S1. The weights of the 96 fractions after lyophilization

| <i>Scutellaria baicalensis</i> |                    |                | <i>Andrographis paniculata</i> |                    |                |
|--------------------------------|--------------------|----------------|--------------------------------|--------------------|----------------|
| Fraction ID                    | RT window<br>(min) | Weight<br>(mg) | Fraction ID                    | RT window<br>(min) | Weight<br>(mg) |
| 1                              | 0.0-5.6            | 3.1            | 1                              | 0.0-3.8            | 19.5           |
| 2                              | 5.6-13.0           | 5.2            | 2                              | 3.8-14.0           | 12.1           |
| 3                              | 13.0-15.0          | 10.1           | 3                              | 14.0-15.7          | 5.6            |
| 4                              | 15.0-16.8          | 8.1            | 4                              | 15.7-16.1          | 4.1            |
| 5                              | 16.8-19.4          | 3.0            | 5                              | 16.1-17.8          | 4.0            |
| 6                              | 19.4-21.3          | 65.5           | 6                              | 17.8-20.1          | 33.1           |
| 7                              | 21.3-22.0          | 4.5            | 7                              | 20.1-21.9          | 13.8           |
| 8                              | 22.0-23.2          | 16.1           | 8                              | 21.9-23.6          | 5.2            |
| 9                              | 23.2-25.0          | 20.1           | 9                              | 23.6-25.1          | 21.6           |
| 10                             | 25.0-27.8          | 3.1            | 10                             | 25.1-26.2          | 2.5            |
| 11                             | 27.8-29.5          | 5.2            | 11                             | 26.2-28.2          | 1.9            |
| 12                             | 29.5-33.4          | 0.6            | 12                             | 28.2-29.9          | 1.2            |
| 13                             | 33.4-34.7          | 4.3            | 13                             | 29.9-31.2          | 0.4            |
| 14                             | 34.7-36.5          | 1.7            | 14                             | 31.2-33.1          | 0.5            |
| 15                             | 36.5-54.5          | 1.5            | 15                             | 33.1-34.8          | 1.1            |
| 16                             | 54.5-55.4          | 0.6            | 16                             | 34.8-36.7          | 0.4            |
| 17                             | 55.4-57.3          | 0.7            | 17                             | 36.7-43.7          | 2.1            |
| 18                             | 57.3-58.4          | 0.1            | 18                             | 43.7-60.0          | 5.2            |
| 19                             | 58.4-60.0          | 0.3            |                                |                    |                |

  

| <i>Glycyrrhiza uralensis</i> |                    |                | <i>Forsythia suspensa</i> |                    |                |
|------------------------------|--------------------|----------------|---------------------------|--------------------|----------------|
| Fraction ID                  | RT window<br>(min) | Weight<br>(mg) | Fraction ID               | RT window<br>(min) | Weight<br>(mg) |
| 1                            | 0.0-3.2            | 14.8           | 1                         | 0.0-5.4            | 71.3           |
| 2                            | 3.2-6.6            | 1.5            | 2                         | 5.4-6.9            | 15.4           |
| 3                            | 6.6-16.2           | 11.2           | 3                         | 6.9-13.9           | 19.3           |
| 4                            | 16.2-19.6          | 28.7           | 4                         | 13.9-15.7          | 18.0           |
| 5                            | 19.6-23.3          | 20.6           | 5                         | 15.7-17.1          | 12.3           |
| 6                            | 23.3-26.3          | 9.5            | 6                         | 17.1-21.2          | 11.7           |
| 7                            | 26.3-29.5          | 8.9            | 7                         | 21.2-24.6          | 7.3            |
| 8                            | 29.5-33.7          | 37.4           | 8                         | 24.6-26.5          | 3.5            |
| 9                            | 33.7-38.8          | 10.2           | 9                         | 26.5-28.4          | 2.0            |
| 10                           | 38.8-41.4          | 4.3            | 10                        | 28.4-30.5          | 3.9            |
| 11                           | 41.4-44.1          | 58.1           | 11                        | 30.5-37.2          | 6.0            |
| 12                           | 44.1-49.0          | 8.1            | 12                        | 37.2-39.5          | 4.5            |
| 13                           | 49.0-52.2          | 2.5            | 13                        | 39.5-41.2          | 1.1            |
| 14                           | 52.2-54.4          | 3.8            | 14                        | 41.2-45.2          | 4.2            |
| 15                           | 54.4-60.0          | 3.0            | 15                        | 45.2-47.1          | 1.6            |
|                              |                    |                | 16                        | 47.1-49.1          | 2.0            |
|                              |                    |                | 17                        | 49.1-50.6          | 0.6            |



|    |           |     |
|----|-----------|-----|
| 18 | 50.6-52.7 | 1.3 |
| 19 | 52.7-54.4 | 3.8 |
| 20 | 54.4-60.0 | 8.8 |

| <i>Lonicera japonica</i> |                 |             | <i>Cirsium japonicum</i> |                 |             |
|--------------------------|-----------------|-------------|--------------------------|-----------------|-------------|
| Fraction ID              | RT window (min) | Weight (mg) | Fraction ID              | RT window (min) | Weight (mg) |
| 1                        | 0.0-6.5         | 46.3        | 1                        | 0.0-6.1         | 13.1        |
| 2                        | 6.5-11.3        | 20.2        | 2                        | 6.1-14.2        | 8.3         |
| 3                        | 11.3-12.8       | 23.6        | 3                        | 14.2-18.1       | 8.4         |
| 4                        | 12.8-14.0       | 21.0        | 4                        | 18.1-23.1       | 16.4        |
| 5                        | 14.0-16.2       | 29.5        | 5                        | 23.1-31.2       | 6.0         |
| 6                        | 16.2-18.3       | 17.9        | 6                        | 31.2-39.5       | 4.3         |
| 7                        | 18.3-20.4       | 13.2        | 7                        | 39.5-43.4       | 1.5         |
| 8                        | 20.4-21.8       | 1.3         | 8                        | 43.4-46.2       | 0.6         |
| 9                        | 21.8-36.0       | 5.1         | 9                        | 46.2-50.7       | 2.1         |
| 10                       | 36.0-38.1       | 0.9         | 10                       | 50.7-55.1       | 2.4         |
| 11                       | 38.1-41.5       | 0.4         | 11                       | 55.1-57.2       | 0.3         |
| 12                       | 41.5-44.2       | 0.4         | 12                       | 57.2-57.9       | 2.5         |
| 13                       | 44.2-48.5       | 0.4         | 13                       | 57.9-60.0       | 1.1         |
| 14                       | 48.5-50.7       | 1.0         |                          |                 |             |
| 15                       | 50.7-53.0       | 0.2         |                          |                 |             |
| 16                       | 53.0-60.0       | 0.9         |                          |                 |             |
